# Supplementary material
Source: publisher site journal article supplement (https://www.spandidos-publications.com/4475/downloadSupplementary)

Figure S1. Effect of TUDCA on TG-induced endoplasmic reticulum stress-associated apoptosis in DRG neurons. Apoptotic DRG neurons were measured by TUNEL staining following treatment with 1  $\mu$ M TG and/or TUDCA. (A) Representative images of TUNEL staining (green) in control, TUDCA, TG and TG + TUDCA groups. Nuclear phenotype was also investigated via DAPI staining (blue). Scale bar, 20  $\mu$ m. (B) Quantitative analysis of percentages of apoptotic cells after TUDCA treatment. (C) Protein expression levels of cleaved caspase-3 and total caspase-3 were determined by western blotting. (D) Relative protein expression levels of cleaved caspase-3 to total caspase-3 for each group were calculated by densitometry. The control group was set at 100%. Data were obtained from three independent experiments and are expressed as the mean  $\pm$  SEM. \*\*\*\*P<0.0001 vs. control group; ###P<0.001 vs. TG group. DRG, dorsal root ganglion; TUDCA, tauroursodeoxycholic acid; TG, thapsigargin.

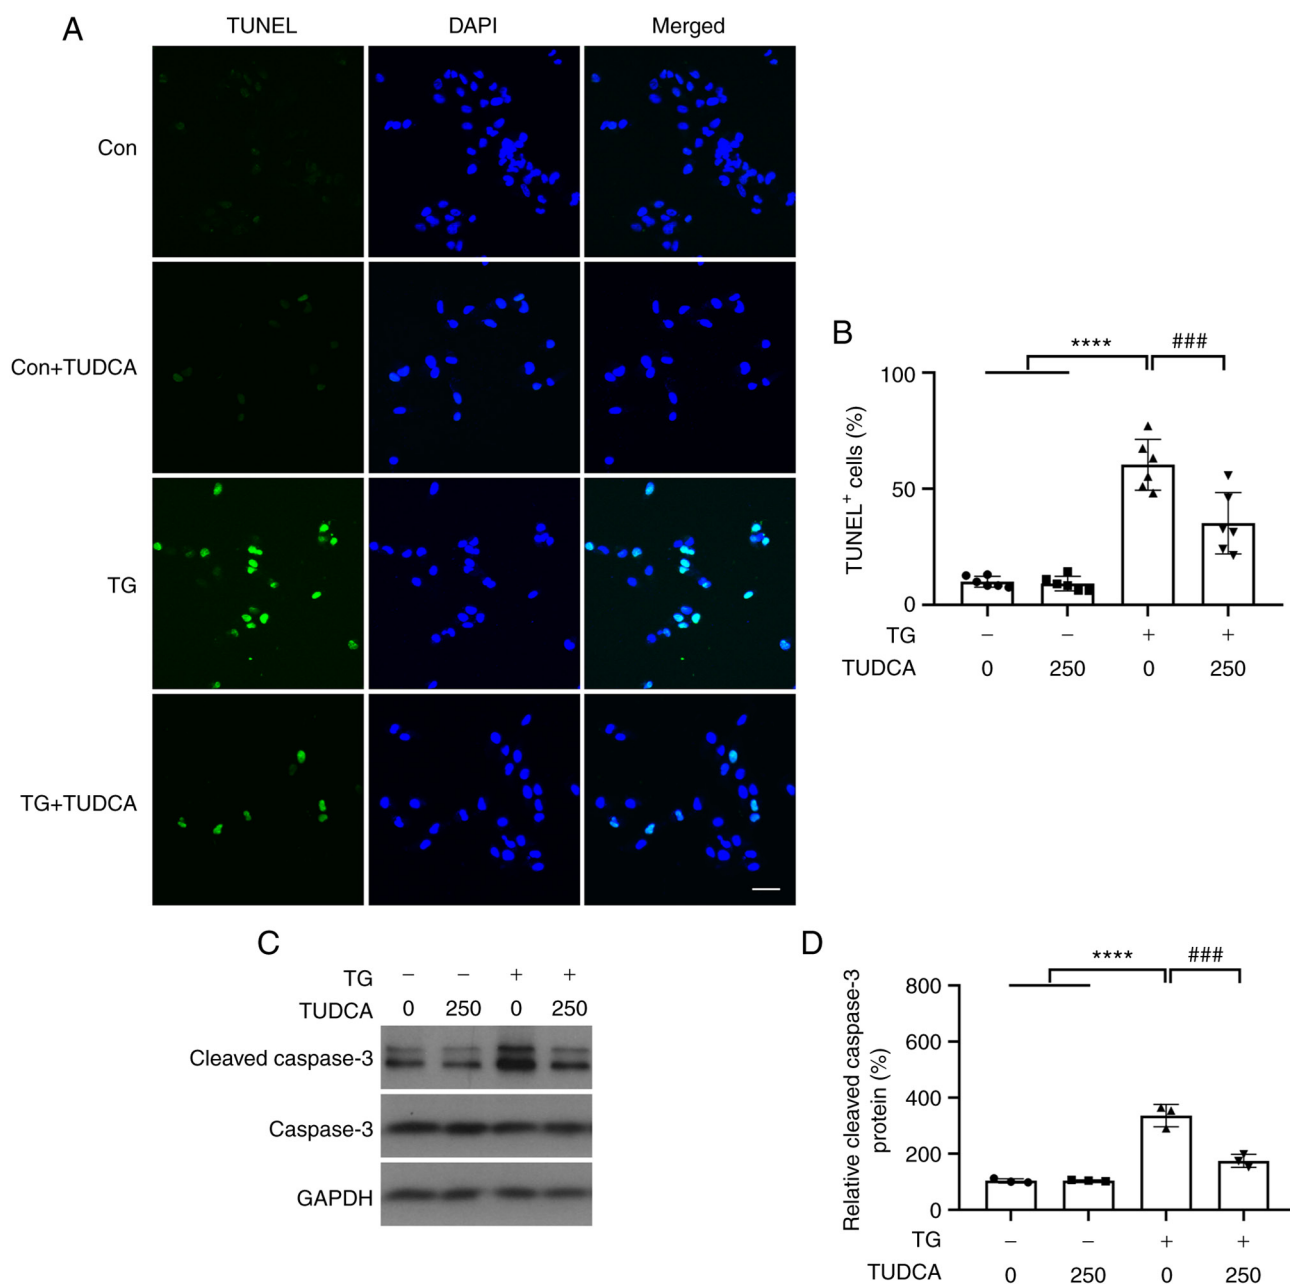

Supplement: Supplementary file 1 [file downloadSupplementary]
